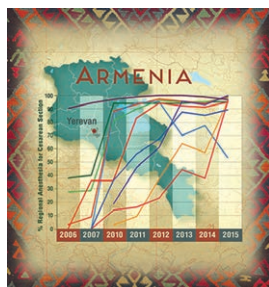

## ON THE COVER:

Disparity exists in anesthesia practices between high- and low-to-middle income countries. The establishment of international collaborations and appropriate practice guidelines may improve care. In this issue of ANESTHESIOLOGY, Yuill *et al.* assess the impact of a multiyear collaboration on obstetric anesthesia practices in the Republic of Armenia. A multinational team of physicians conducted six visits to Armenia between 2006 and 2015 to observe current practice and establish standards of obstetric anesthesia care. Over the course of the collaboration, guidelines for obstetric anesthesia were drafted and approved by the Armenian Ministry of Health. Collaboration to update and standardize obstetric anesthesia practices led to national practice guidelines and sustained improvements in clinical care in the Republic of Armenia.

- Yuill *et al.*: Establishing Obstetric Anesthesiology Practice Guidelines in the Republic of Armenia: A Global Health Collaboration, p. 220

## ◆ THIS MONTH IN ANESTHESIOLOGY

1A

## ■ SCIENCE, MEDICINE, AND THE ANESTHESIOLOGIST

13A

## ■ INFOGRAPHICS IN ANESTHESIOLOGY

15A

## ◆ EDITORIAL VIEWS

### Can We Really Suggest that Anesthesia Might Cause Attention-deficit/Hyperactivity Disorder?

209

*D. Efron, L. Vutskits, and A. J. Davidson*

### CME Phenylephrine Infusion: Driving a Wedge in Our Practice of Left Uterine Displacement?

212

*M. K. Farber and B. T. Bateman*

### Measuring Perioperative Mortality: The Key to Improvement

215

*I. A. Walker and I. H. Wilson*

### Decision to Extubate Brain-injured Patients: Limiting Uncertainty in Neurocritical Care

217

*T. Godet, R. Chabanne, and J.-M. Constantin*

## ■ SPECIAL ARTICLE

### ◆ Establishing Obstetric Anesthesiology Practice Guidelines in the Republic of Armenia: A Global Health Collaboration

220

*G. Yuill, A. Amroyan, S. Millar, E. Vardapetyan, A. S. Habib, and M. D. Owen*

There is little information describing the dissemination of guidelines for obstetric anesthesia care from high- to low-to-middle income countries. This article describes the development and implementation of national obstetric anesthesia practice guidelines in Armenia.

◆ Refers to This Month in Anesthesiology

◆ Refers to Editorial Views

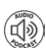

This article has an Audio Podcast

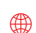

See Supplemental Digital Content

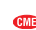

CME Article

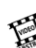

This article has a Video Abstract

## ■ PERIOPERATIVE MEDICINE

## CLINICAL SCIENCE

- ◆ Association between Exposure of Young Children to Procedures Requiring General Anesthesia and Learning and Behavioral Outcomes in a Population-based Birth Cohort 227

*D. Hu, R. P. Flick, M. J. Zaccariello, R. C. Colligan, S. K. Katusic, D. R. Schroeder, A. C. Hanson, S. L. Buenvenida, S. J. Gleich, R. T. Wilder, J. Sprung, and D. O. Warner*

In a more recent population-based birth cohort in which contemporary anesthetic techniques were used, multiple, but not single, exposures before age 3 yr are associated with increased frequency of learning disabilities and attention-deficit/hyperactivity disorder. However, single exposures are associated with deficits in some domains of academic achievement tests. Although these data confirm previous reports and thus demonstrate a robust association, they do not permit evaluation of whether anesthesia *per se* is causal.

- ◆◆ CME Left Lateral Table Tilt for Elective Cesarean Delivery under Spinal Anesthesia Has No Effect on Neonatal Acid–Base Status: A Randomized Controlled Trial 241

*A. J. Lee, R. Landau, J. L. Mattingly, M. M. Meenan, B. Corradini, S. Wang, S. R. Goodman, and R. M. Smiley*

Maternal supine position during elective cesarean delivery with spinal anesthesia in healthy term women did not impair neonatal acid–base status compared to 15° left tilt when maternal systolic blood pressure was maintained with a phenylephrine infusion.

- ◆◆ Monitoring Anesthesia Care Delivery and Perioperative Mortality in Kenya Utilizing a Provider-driven Novel Data Collection Tool 250

*B. Sileshi, M. W. Newton, J. Kiptanui, M. S. Shotwell, J. P. Wanderer, M. Mungai, J. Scherdin, P. A. Harris, S. H. Vermund, W. S. Sandberg, and M. D. McEvoy*

Prospective real-time collection of postoperative mortality data for 21 months in a lower- to middle-income country showed procedure-specific differences in 7-day mortality. Mortality was highest in emergency surgery and lowest in cesarean delivery, the most common surgical procedure.

- ◆ Validation of Innovative Techniques for Monitoring Nociception during General Anesthesia: A Clinical Study Using Tetanic and Intracutaneous Electrical Stimulation 272

*S. Funcke, S. Sauerlaender, H. O. Pinnschmidt, B. Saugel, K. Bremer, D. A. Reuter, and R. Nitzschke*

Changes in the Analgesia Nociception Index and Surgical Pleth Index, as well as pupillary dilatation, were sensitive and specific for painful stimulation. The bispectral index is neither sensitive to painful stimuli nor the effects of analgesics and therefore is a poor marker of analgesia.

- ◆ Pupillometry-guided Intraoperative Remifentanyl Administration *versus* Standard Practice Influences Opioid Use: A Randomized Study 284

*N. Sabourdin, J. Barrois, N. Louvet, A. Rigouzzo, M.-L. Guye, C. Dadure, and I. Constant*

Objective pupil measurements were used to guide intraoperative remifentanyl dosing in order to maintain postinduction pupil diameter. In a randomized study, compared with standard approaches, patients in whom remifentanyl dosing was pupillometry guided received 50% less intraoperative remifentanyl and needed slightly less postoperative patient-controlled analgesia morphine.

- A Prospective Study of Age-dependent Changes in Propofol-induced Electroencephalogram Oscillations in Children 293

*J. M. Lee, O. Akeju, K. Terzakis, K. J. Pavone, H. Deng, T. T. Houle, P. G. Firth, E. S. Shank, E. N. Brown, and P. L. Purdon*

In 97 patients 0–21 yr old, propofol-induced electroencephalogram oscillations were qualitatively similar among patients 1 yr through adulthood (slow and coherent alpha oscillations), but not for children less than 1 yr (noncoherent alpha oscillations). Such age-dependent changes in electroencephalogram oscillations likely reflect critical neurodevelopmental changes and have implications for brain monitoring in children.

# Blind Intubation through Self-pressurized, Disposable Supraglottic Airway Laryngeal Intubation Masks: An International, Multicenter, Prospective Cohort Study

307

*K. Ruetzler, S. E. Guzzella, D. W. Tscholl, T. Restin, M. Cribari, A. Turan, J. You, D. I. Sessler, B. Seifert, T. Gaszynski, M. T. Ganter, and D. R. Spahn*

In this multicenter, prospective study, 99% of 1,000 patients with a supraglottic airway could be oxygenated and ventilated. Blind intubation succeeded in 78% of all patients, although the success rate significantly varied among the three centers (41, 80, and 84%), but when possible was easy, quick, and did not cause serious complications.

# Predicting Perioperative Transfusion in Elective Hip and Knee Arthroplasty: A Validated Predictive Model

317

*J. To, R. Sinha, S. W. Kim, K. Robinson, B. Kearney, D. Howie, and L. B. To*

Preoperative hemoglobin and hip (rather than knee) replacement predicts transfusion requirement. There was an interaction between age and gender, with transfusions being more often given in women more than 65 yr old.

# Frequency and Type of Situational Awareness Errors Contributing to Death and Brain Damage: A Closed Claims Analysis

326

*C. M. Schulz, A. Burden, K. L. Posner, S. L. Mincer, R. Steadman, K. J. Wagner, and K. B. Domino*

Situational awareness errors resulting in death or brain damage remain prevalent causes of malpractice claims in the 21st century.

## CRITICAL CARE MEDICINE

### CLINICAL SCIENCE

# Extubation Success Prediction in a Multicentric Cohort of Patients with Severe Brain Injury

338

*K. Asehnoune, P. Seguin, S. Lasocki, A. Roquilly, A. Delater, A. Gros, F. Denou, P.-J. Mahé, N. Nessler, D. Demeure-dit-Latte, Y. Launey, K. Lakhal, B. Rozec, Y. Mallédant, V. Sébille, S. Jaber, A. Le Thuaud, F. Feuillet, R. Cinotti, and ATLANREA group*

In patients who met at least three of the four VISAGE criteria (visual pursuit, swallowing, age, and Glasgow for extubation), successful extubation was achieved in the majority of patients with severe brain injury. The VISAGE score, which can be readily applied at the bedside, has the potential to predict successful extubation, permit earlier extubation, and reduce complications associated with prolonged mechanical ventilation.

### BASIC SCIENCE

# Ketamine and Etomidate Down-regulate the Hypothalamic–Pituitary–Adrenal Axis in an Endotoxemic Mouse Model

347

*E. Besnier, T. Clavier, M.-C. Tonon, J. Selim, A. Lefevre-Scelles, F. Morin, F. Tamion, B. Dureuil, H. Castel, and V. Compere*

Induction of endotoxemia in mice by injection of lipopolysaccharide induced the relative failure of the hypothalamic–pituitary–adrenal axis function by down-regulation of the expression of major adrenocortical enzymes and likely relative adrenal insufficiency. Both etomidate and ketamine produced an early deficit of adrenal function in the endotoxemic model that was reversible within 48 h.

## CONTENTS

### ■ PAIN MEDICINE

#### BASIC SCIENCE

##### **Acetaminophen Metabolite *N*-Acylphenolamine Induces Analgesia *via* Transient Receptor Potential Vanilloid 1 Receptors Expressed on the Primary Afferent Terminals of C-fibers in the Spinal Dorsal Horn**

355

*N. Ohashi, D. Uta, M. Sasaki, M. Ohashi, Y. Kamiya, and T. Kohno*

Direct application of *N*-acylphenolamine but not of acetaminophen reduced excitatory transmission in the spinal cord dorsal horn by direct activation of transient receptor potential vanilloid 1 receptors on presynaptic C-fiber terminals. Increased activity of transient receptor potential vanilloid 1 in inflammatory pain provides a mechanism by which acetaminophen may reduce inflammatory pain through its metabolite *N*-acylphenolamine.

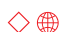

##### **Assessment of Behavioral Disruption in Rats with Abdominal Inflammation Using Visual Cue Titration and the Five-choice Serial-reaction Time Task**

372

*T. J. Martin, T. J. Strassburg, A. L. Grigg, S. A. Kim, D. G. Ririe, and J. C. Eisenach*

Performance in an operant task requiring sustained visual attention was developed as a rat model to study responses to nociception from intraperitoneal lactic acid-induced acute abdominal inflammation. Known analgesics morphine and ketoprofen dose-dependently reversed the effects of abdominal inflammation, but not the effects of the attention disruptor scopolamine, on performance deficits.

### ■ EDUCATION

#### IMAGES IN ANESTHESIOLOGY

##### **Congenital Pulmonary Airway Malformation**

382

*R. Subramanyam, K. Ledbetter, R. Fleck, and M. Mahmoud*

##### **Clinical Complications with the Delivery of Inhaled Epoprostenol in the Operating Room**

383

*A. M. Bhatt and E. J. Stein*

#### CLINICAL CONCEPTS AND COMMENTARY

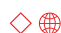

##### **Operating Room Crisis Checklists and Emergency Manuals**

384

*D. L. Hepner, A. F. Arriaga, J. B. Cooper, S. N. Goldhaber-Fiebert, D. M. Gaba, W. R. Berry, D. J. Boorman, and A. M. Bader*

Crisis checklists and emergency manuals are cognitive aids that help team performance and adherence to evidence-based practices during operating room crises. Resources to enable local implementation and training (key for effective use) are linked at <http://www.emergencymanuals.org>.

#### MIND TO MIND

##### **I'm a theater artist...**

393

*R. Goyal*

##### **The New Examiner**

395

*S. Crowe*

### ■ CORRESPONDENCE

##### **Nocturnal Dexmedetomidine in Nonintubated, Critically Ill Patients: Sleep or Sedation?**

397

*H. G. Miranda, A. D. Krystal, and M. A. Fierro*

##### **Low-dose, Nontitrated Dexmedetomidine Trials: Clarifying Possible Coenrollment**

398

*M. C. Reade*

##### **In Reply**

*D.-X. Wang and D. Ma*

##### **Is the PeriOperative ISchemic Evaluation-2 Trial Equipoised?**

399

*S. Madi-Jebara and G. Sleilaty*

**Venous Thromboembolism Prevention: The Evidence for Aspirin?**

401

*R. J. Gordon***In Reply***J. W. Eikelboom and P. J. Devereaux*■ **REVIEWS OF EDUCATIONAL MATERIAL**

403

■ **CAREERS & EVENTS**

17A

**INSTRUCTIONS FOR AUTHORS**

The most recently updated version of the Instructions for Authors is available at [www.anesthesiology.org](http://www.anesthesiology.org). Please refer to the Instructions for the preparation of any material for submission to ANESTHESIOLOGY.

Manuscripts submitted for consideration for publication must be submitted in electronic format. The preferred method is via the Journal's Web site (<http://www.anesthesiology.org>). Detailed directions for submissions and the most recent version of the Instructions for Authors can be found on the Web site (<http://www.anesthesiology.org>). Books and educational materials should be sent to Alan Jay Schwartz, M.D., M.S.Ed., Director of Education, Department of Anesthesiology and Critical Care Medicine, The Children's Hospital of Philadelphia, 34th Street and Civic Center Blvd., Room 9327, Philadelphia, Pennsylvania 19104-4399. Requests for permission to duplicate materials published in ANESTHESIOLOGY should be submitted in electronic format, to the Permissions Department ([journalpermissions@lww.com](mailto:journalpermissions@lww.com)). Advertising and related correspondence should be addressed to Advertising Manager, ANESTHESIOLOGY, Wolters Kluwer Health, Inc., Two Commerce Square, 2001 Market Street, Philadelphia, Pennsylvania 19103 (Web site: <http://www.wkadcen.com/>). Publication of an advertisement in ANESTHESIOLOGY does not constitute endorsement by the Society or Wolters Kluwer Health, Inc. of the product or service described therein or of any representations made by the advertiser with respect to the product or service.

**ANESTHESIOLOGY** (ISSN 0003-3022) is published monthly by Wolters Kluwer Health, Inc., 14700 Citicorp Drive, Bldg 3, Hagerstown, MD 21742. Business office: Two Commerce Square, 2001 Market Street, Philadelphia, PA 19103. Periodicals postage paid at Hagerstown, MD, and at additional mailing offices. Copyright © 2017, the American Society of Anesthesiologists, Inc.

**Annual Subscription Rates:** *United States*—\$981 Individual, \$1876 Institution, \$354 In-training. *Rest of World*—\$930 Individual, \$2084 Institution, \$354 In-training. Single copy rate \$189. Subscriptions outside of North America must add \$54 for airfreight delivery. Add state sales tax, where applicable. The GST tax of 7% must be added to all orders shipped to Canada (Wolters Kluwer Health, Inc.'s GST Identification #895524239, Publications Mail Agreement #1119672). Indicate in-training status and name of institution. Institution rates apply to libraries, hospitals, corporations, and partnerships of three or more individuals. Subscription prices outside the United States must be prepaid. Prices subject to change without notice. Subscriptions will begin with currently available issue unless otherwise requested. Visit us online at [www.lww.com](http://www.lww.com).

Individual and in-training subscription rates include print and access to the online version. Online-only subscriptions for individuals (\$301) and persons in training (\$301) are available to nonmembers and may be ordered by downloading a copy of the Online Subscription FAXback Form from the Web site, completing the information requested, and faxing the completed form to 301-223-2400. Institutional rates are for print only; online subscriptions are available via Ovid. Institutions can choose to purchase a print and online subscription together for a discounted rate. Institutions that wish to purchase a print subscription, please contact Wolters Kluwer Health, Inc., 14700 Citicorp Drive, Bldg 3, Hagerstown, MD 21742; phone: 800-638-3030; fax: 301-223-2400. Institutions that wish to purchase an online

subscription or online with print, please contact the Ovid Regional Sales Office near you or visit [www.ovid.com/site/index.jsp](http://www.ovid.com/site/index.jsp) and select Contact and Locations.

**Address for non-member subscription information, orders, or change of address** (except Japan): Wolters Kluwer Health, Inc., 14700 Citicorp Drive, Bldg 3, Hagerstown, MD 21742; phone: 800-638-3030; fax: 301-223-2400. In Japan, contact Wolters Kluwer Health Japan Co., Ltd., Forecast Mita Building 5th floor, 1-3-31 Mita Minato-ku, Tokyo, Japan 108-0073; phone: +81 3 5427 1969; email: [journal@wkjapan.co.jp](mailto:journal@wkjapan.co.jp).

**Address for member subscription information, orders, or change of address:** Members of the American Society of Anesthesiologists receive the print and online journal with their membership. To become a member or provide a change of address, please contact the American Society of Anesthesiologists, 1061 American Lane, Schaumburg, Illinois 60173-4973; phone: 847-825-5586; fax: 847-825-1692; email: [membership@ASAhq.org](mailto:membership@ASAhq.org). For all other membership inquiries, contact Wolters Kluwer Health, Inc., Customer Service Department, P.O. Box 1610, Hagerstown, MD 21740; phone: 800-638-3030; fax: 301-223-2400.

**Postmaster:** Send address changes to ANESTHESIOLOGY, P.O. BOX 1610, Hagerstown, MD 21740.

**Advertising:** Please contact Hilary Druker, Advertising Field Sales Representative, Health Learning, Research & Practice, Medical Journals, Wolters Kluwer Health, Inc.; phone: 609-304-9187; e-mail: [Hilary.Druker@wolterskluwer.com](mailto:Hilary.Druker@wolterskluwer.com). For classified advertising: Joe Anzuena, Recruitment Advertising Representative, Wolters Kluwer Health, Inc., Two Commerce Square, 2001 Market Street, Philadelphia, PA 19103; phone: 215-521-8532; fax: 215-701-2410; e-mail: [Joe.Anzuena@wolterskluwer.com](mailto:Joe.Anzuena@wolterskluwer.com).
